1                   **Wide mismatches in the sequences of primers and probes for Monkeypox**  
2                                           **virus diagnostic assays**

3  
4                   Fuqing Wu<sup>1\*</sup>, Jeremiah Oghuan<sup>1</sup>, Anna Gitter<sup>1</sup>, Kristina D. Mena<sup>1</sup>, Eric L. Brown<sup>1</sup>

5  
6  
7                   1: The University of Texas Health Science Center at Houston, School of Public Health  
8                   Houston, Texas, USA 77030

9  
10                   \* Correspondence to FW at [fuqing.wu@uth.tmc.edu](mailto:fuqing.wu@uth.tmc.edu).

11  
12  
13  
14  
15  
16  
17  
18  
19  
20  
21  
22  
23

24 **Abstract**

25 Rapid and accurate diagnosis of infections is fundamental to containment of disease. Several  
26 monkeypox virus (MPV) real-time diagnostic assays have been recommended by the CDC;  
27 however, the specificity of the primers and probes in these assays for the ongoing MPV outbreak  
28 has not been investigated. We analyzed the primer and probe sequences present in the CDC  
29 recommended monkeypox virus (MPV) generic real-time PCR assay by aligning those  
30 sequences against 1,730 MPV complete genomes reported in 2022 worldwide. Sequence  
31 mismatches were found in 99.08% and 97.46% of genomes for the MPV generic forward and  
32 reverse primers, respectively. Mismatch-corrected primers were synthesized and compared to the  
33 generic assay for MPV detection. Results showed that the two primer-template mismatches  
34 resulted in a ~11-fold underestimation of initial template DNA in the reaction and 4-fold increase  
35 in the 95% LOD. We further evaluated the specificity of seven other real-time PCR assays used  
36 for MPV and orthopoxvirus (OPV) detection and identified two assays with the highest matching  
37 score (>99.6%) to the global MPV genome database in 2022. Genetic variations in the primer-  
38 probe regions across MPV genomes could indicate the temporal and spatial emergence pattern of  
39 monkeypox disease. Our results show that the current MPV real-time generic assay may not be  
40 optimal to accurately detect MPV, and the mismatch-corrected assay with full complementarity  
41 between primers and current MPV genomes could provide a more sensitive and accurate  
42 detection of MPV.

43

44

45

46

## 47 **Introduction**

48 Our ability to detect emerging and re-emerging infectious disease agents has never been so  
49 important as it is today. While the SARS-CoV-2 is gradually becoming an endemic virus, the  
50 world is now seeing the re-emergence of the monkeypox virus (MPV). As of September 26,  
51 2022, there were over 25,000 reported cases in the United States and over 66,000 cases in 106  
52 countries <sup>1</sup>. The World Health Organization (WHO) has declared a public health emergency of  
53 international concern on July 23, 2022 to respond the rapid spread of MPV worldwide.

54  
55 Monkeypox virus, a species of the *Orthopoxvirus* (OPV) genus, is a zoonotic double-stranded  
56 DNA virus with a ~197 kbp genome <sup>2,3</sup>. In 1970, monkeypox was first identified in humans in  
57 the Democratic Republic of the Congo and in other African nations <sup>4</sup>. Sporadic monkeypox cases  
58 were reported outside of Africa (U.S. and Europe), however, the infections were either related to  
59 international travel or exposure to animals imported from Africa <sup>5,6</sup>. The first MPV case  
60 associated with the present outbreak was reported on May 6 in the United Kingdom, followed by  
61 cases in Spain, Portugal, and Canada <sup>5,7</sup>. On May 18, cases were reported in Belgium and Italy;  
62 on May 20, cases were reported in Australia, France, Germany, and the Netherlands; and on May  
63 21, cases were reported in Switzerland and Israel <sup>7</sup>. Such a wide outbreak within two weeks in  
64 multiple counties across continents suggests that early non-reported transmission occurred before  
65 May 2022 <sup>8</sup>.

66  
67 The polymerase-chain reaction (PCR) has been used in the detection and diagnosis of viral  
68 infections such as SARS-CoV-2. On June 6, 2022 the Centers for Disease Control and  
69 Prevention (CDC) released a real-time PCR test using generic primers and probe for the

70 detection of MPV<sup>9</sup> based on previous work conducted in 2010 describing the detection of a  
71 West African MPV strain and a Congo Basin MPV strain<sup>10</sup>. This MPV generic assay has been  
72 used to identify human MPV infections and MPV present in wastewater samples<sup>11,12</sup>. Several  
73 other real-time PCR assays have also been reported for MPV or OPV detection in clinical  
74 samples<sup>10,13–17</sup>. However, the specificity and suitability of these generic primers and probes need  
75 to be carefully addressed because most of the primers and probes (generic or lineage-specific)  
76 were based on sequenced genomes obtained from MPV strains circulating more than a decade  
77 ago (2002 to 2009). Given the rapid evolution of viral species, including DNA viruses<sup>18,19</sup> it is  
78 likely that mutations have emerged in presently circulating MPV strains including the regions  
79 targeted by those oligos used for MPV detection. The present report analyzes the oligo sequences  
80 used in conjunction with the current real-time MPV assays by aligning primer sequences against  
81 683 reported MPV complete genomes from GISAID as of August 5, 2022. This analysis  
82 identified wide variations in the primer and probe sequences compared to the genome of  
83 currently circulating MPV stains. Our results indicate that the current MPV real-time generic  
84 assay may not be optimal to accurately detect MPV.

85

86

## 87 **Materials and Methods**

88 **Data source.** The MPV genomes were downloaded from GISAID (<https://gisaid.org/>). As of  
89 September 22 (10:50 am), 2022, 1,779 complete MPV genomes were available, including 1,730  
90 genomes (samples) collected and sequenced in 2022. The remaining 49 samples include 7  
91 samples from 1962 to 2005, 11 samples collected in 2006, 12 samples in 2007, 7 samples in  
92 2017, 8 samples in 2018, 2 samples in 2019, and 2 samples in 2021. In the United States, there

93 are 333 complete MPV genomes sampled from May 2022 to August 2022. Metadata includes  
94 accession ID, sample collection date, sequence data submission date, and sampling location  
95 (continent/country) associated with the sequences. The monkeypox virus reference genome  
96 Zaire-96-I-16 was downloaded from NCBI (NC\_003310.1). MPV real-time assays (primers and  
97 probes) were from published studies including MPV Generic assay <sup>9</sup>, MPV\_O2L <sup>13</sup>, MPV\_F3L  
98 <sup>14</sup>, MPV\_C3L <sup>10</sup>, MPV\_G2R\_WA <sup>10</sup>, OPV\_B2R <sup>15</sup>, OPV\_I7L <sup>16</sup>, and OPV\_F8L <sup>17</sup>.

99  
100 **Sequence alignment.** Genome sequences were downloaded as *fasta* files and imported into R  
101 (version 4.1.3) as the MPV genome database for analysis. We aligned each of the oligo  
102 (including forward primer, reverse primer, and probe) sequences and their reverse complements  
103 to the database and computed the percentage of genomes where the oligo sequences were a 100%  
104 match. The MPV generic assay and the MPV\_G2R\_WA assay target two regions of the genome  
105 (in inverted terminal repeats region), the other assays have one target. If the oligo is found in  
106 more than one target but with different number of matches, the larger value is used as the  
107 percentage of 100% match. For example, the forward primer used in the G2R\_WA assay is  
108 found in sense and antisense strands, but the number of 100% genome matches is 1,779 and  
109 1,778, respectively, therefore, 1,779 was used to calculate the percentage of matching genomes.  
110 For non-matches, sequences were extracted and aligned using SnapGene software  
111 (<https://www.snapgene.com/>) to identify the specific nucleotides that differ between the oligos  
112 and the genomic data. The major types of sequence variation(s) are listed in Figures 1 and 3A. In  
113 total, the original sequence and identified sequence variations accounted for 99.2% ~ 100% of  
114 the total genomes for the MPV real-time assays. These analyses were performed with customized  
115 R script.

116

117 **Real-time PCR.** Quantitative PCR was performed with PCR primers and TaqMan probe. Briefly,

118 the real-time PCR Multiplex Supermix (Bio-Rad, Cat #: 12010220) was mixed with the primers,

119 probe, and nuclease-free H<sub>2</sub>O (VWR, Cat #: 10220-402) and then added to respective wells of a

120 96-well PCR plate (Bio-Rad, Cat #: HSL9605). For MPV\_FR-generic assay, forward primer

121 MPV-F-generic (5'-GGA AAA TGT AAA GAC AAC GAA TAC AG-3') and reverse primer

122 MPV-R-generic (5'-GCT ATC ACA TAA TCT GGA AGC GTA-3') were used; for MPV\_FR-

123 m assay, mismatch-corrected primers, *i.e.*, MPV-F-m (5'-GGA AAG TGT AAA GAC AAC

124 GAA TAC AG-3') and MPV-R-m (5'-GCT ATC ACA TAA TCT GAA AGC GTA-3'), were

125 used (Figure 1A). Probe MPV-P-generic (/56-FAM/AA GCC GTA A/ZEN/T CTA TGT TGT

126 CTA TCG TGT CC/3IABkFQ/) was used for both assays. All primers and probe were

127 synthesized from Integrated DNA Technologies (IDT) and final reaction concentrations were

128 500 nM and 250 nM, respectively. A 211-bp MPV DNA covering the primer and probe region

129 was synthesized at IDT and used as the PCR template. This synthetic DNA fragment is found in

130 96.71% (1,673 out of 1,730) of MPV genomes reported in 2022. The standard curves for the

131 MPV generic assay (with mismatches) and for the mismatch-corrected assay (with full

132 complementarity) were generated by serial ten-fold dilutions of the synthesized MPV gene

133 fragment from  $2.16 \times 10^0 \sim 2.16 \times 10^7$  copies/ $\mu$ L. Each concentration has three replicates, and the

134 mean value is used to build the standard curve. For a fine determination of the limit of detection

135 (LOD) for both assays, we used two-fold serial dilutions starting from 21.6 copies/ $\mu$ L and ran 16

136 replicates at each concentration tested. Another 16 replicates were performed to confirm results

137 for the mismatch-corrected assay at 1.3 copies/ $\mu$ L. Cycle threshold (C<sub>t</sub>) values above 40 were

138 considered negative. The LOD is defined as the lowest concentration of targets at which more

139 than 95% of replicates are positive. The real-time PCR reactions were carried out using a Bio-  
140 Rad CFX Opus 96 Detection System at the following conditions: polymerase activation (95 °C  
141 for 3 min), PCR (48 cycles, denature at 95 °C for 3 s, and anneal/extend at 60 °C for 30 s).

142  
143 **Mutation-based epidemiological analysis.** For each MPV assay tested, we identified the major  
144 variation type(s) in the genome database and then assigned an identity as ‘match’ or ‘variation’  
145 to each genome. Two variation types were found for the MPV\_G2R\_WA assay and were labeled  
146 as ‘Variation\_1’ and ‘Variation\_2’, respectively. Merging with the metadata associated with the  
147 genome, we summarized the number of genomes for ‘match’ and ‘variation’ groups based on the  
148 sampling collection time (year), and sampling location (continent). We also sub-grouped the  
149 database by only selecting the year ‘2022’ to compute ‘variation’ percentages present in the  
150 current MPV outbreak.

151

## 152 **Results**

### 153 **Generic MPV forward and reverse primers do not match the majority of reported genomes.**

154 To investigate whether forward and reverse primers and probe in the MPV generic assay match  
155 to the genomes present in the current MPV outbreak, we aligned the three oligo sequences and  
156 their reverse complements against the reported 1,730 complete genomes available in 2022. The  
157 MPV generic forward sequence (MPV-F) had 100% identity to 4 genomes (0.23%). A single-  
158 nucleotide mutation A194165G (synonymous mutation, MPV-F-m in Figure 1A) was found in  
159 99.08% of the published MPV genomes in 2022 (Figure 1B), mostly from May to August 2022.  
160 Similar observations were also found in the generic reverse primer (MPV-R), which only  
161 matches to 1.73% of the genomes. A nonsynonymous substitution, G194233A in the reverse

162 primer region, was observed in 97.46% of the genomes. In contrast, the probe sequence (MPV-P)  
163 is conserved and matches 99.31% of the genomes in the database.

164  
165 We further compared the MPV generic primers and probe with sequenced samples from the U.S.  
166 Of the total of 330 genomes reported from May to August 2022, the A194165G mutation in the  
167 forward primer region was observed in all U.S. genomes, and the G194233A mutation observed  
168 in the reverse primer was found in 97.58% of the U.S. genomes (Figure 1C) consistent with the  
169 results in Figure 1B. These results show that the CDC recommended forward and reverse  
170 primers used for MPV generic testing are not 100% identical to the major genome sequences in  
171 recent samples with MPV.

172  
173 **Mismatch-corrected primers have improved quantification and lower limits of detection.**

174 Some studies have reported positive detection of MPV in clinical and wastewater samples using  
175 the generic real-time assay<sup>11,12</sup>, suggesting that these primers can amplify the targeted region  
176 even with a substitution in each of the primers. We therefore evaluated the real-time PCR  
177 performance for the generic primers (FR\_generic) and new primers with mismatches corrected  
178 (FR\_match) using a synthesized 211-bp MPV gene fragment (found in 96.71% of genomes in  
179 2022) covering the primer and probe region. Standard curves from serial 7-log dilutions show  
180 that both assays have similar amplification efficiencies with  $R^2 > 0.99$  (Figure 2A-B). Under the  
181 same concentrations of MPV gene template ranging from  $2.16 \sim 2.16 \times 10^7$  copies/ $\mu$ L, MPV  
182 FR\_generic has a consistently higher Ct values ( $3.46 \pm 0.39$ ) than FR\_match, suggesting that the  
183 two mismatches in FR\_generic primers cause about 11-fold underestimation of the initial  
184 template concentration (Figure 2C). We next evaluated the limit of detection (LOD) by



185 conducting 2X dilutions of template DNA, and each has ~16 replicates. The 95% LOD for  
186 FR\_generic assay is 10.8 copies per reaction while the FR\_match is 2.7 copies per reaction  
187 (Table 1). Together, these results showed that the current MPV generic assay could still detect  
188 MPV, but the template concentration quantified from this assay is underestimated by about an  
189 order of magnitude. In addition, the mismatch-corrected primers have a lower 95% limit of  
190 detection, which is important for samples with low MPV concentrations.

191

192 **Evaluation of the specificity of other primers and probes for monkeypox virus and**  
193 **orthopoxvirus (OPV) detection.**

194 Next, we evaluated seven other developed real-time PCR assays, targeting *O2L*, *F3L*, *C3L*, and  
195 *G2R* genes for MPV, *B2R*, *I7L* and *F8L* genes for OPV detection. The selected targets are  
196 generally conserved regions within viral genomes to maximize viral detection<sup>13,15</sup>. We aligned  
197 primer and probe sequences and their reverse complements in the seven assays against the total  
198 1,779 MPV genomes and computed the percentage of genomes with a 100% match. As shown in  
199 Table 1, the four reported assays designed for MPV detection have varied results. The primers in  
200 MPV\_O2L have a ~99% match with the database, but the probe only matches 1.8% of genomes.  
201 This ratio goes down to 0.23% when aligned to the genomes in 2022. Primers and probe  
202 sequences used in the MPV\_F3L assay matches >99.7% of the genomes, suggesting its  
203 suitability for detection of the MPV-2022 outbreak. The MPV\_C3L assay designed for the  
204 detection of the MPV Congo Basin strain poorly matches to the current MPV genomes (0.23%).  
205 Primers used in the MPV\_G2R\_WA assay designed to detect the West African strain showed a  
206 100% match to the database and 99.65% match for the probe, thereby validating previous  
207 phylogenetic analysis results that the current MPV lineage belonging to the West Africa clade<sup>20</sup>.

208

209 We further evaluated three real-time assays (OPV\_B2R, OPV\_I7L, and OPV\_F8L) for the  
210 detection of viruses belonging to the *Orthopoxvirus* genus, which includes monkeypox virus,  
211 camelpox virus, cowpox virus, and vaccinia virus<sup>21</sup>. OPV\_B2R primers highly match the  
212 database genomes, but its probe sequence has no match (Table 2). OPV\_I7L has good matches  
213 for the forward primer and probe, but its reverse primer only matches 1.56% of the genomes.  
214 OPV\_F8L oligos for the non-variola OPV generic test recommended by CDC has a high match  
215 percentage (>99%) with the genomes (Table 2). Thus, the MPV\_F3L, MPV\_G2R\_WA, and  
216 OPV\_F8L assays matches to >99% of the sequenced MPV genomes.

217

218 **Genetic variations across real-time PCR assays for MPV or OPV detection and**  
219 **epidemiological analysis.**

220 Probes in MPV\_O2L and OPV\_B2R and reverse primer in OPV\_I7L match 0 ~ 1.56% of the  
221 genomes, suggesting potential variations in the current MPV genomes. We next analyzed MPV  
222 genomic sequences to identify the main variations. About 98% of the MPV genomes have a G-  
223 >T mutation in the probe used in MPV\_O2L assay, and this mutation is present in 99.48% of the  
224 MPV-2022 outbreak genomes (Figure 3A). Further analysis based on the sample collection date  
225 identified this G->T mutation in two samples in 1962 and 1970, was not detected in samples  
226 from 1978 to 2007, and re-emerged from 2017 onward and became dominant in current outbreak  
227 (Figure 3B). For the OPV\_I7L assay, a C->T mutation was observed at the 3' end of the reverse  
228 primer in 95.11% of all genomes and in 97.75% of genomes sequenced in 2022. It is interesting  
229 that this mutation is mostly observed in samples from Europe, South, and North America  
230 whereas the original sequence was more common in samples from Africa and Asia (Figure 3C).

231 A G->C substitution in the probe sequence of OPV\_B2R was observed in nearly all genomes  
232 sequenced in the MPV-2022 outbreak (Figure 3A).

233  
234 The MPV\_G2R\_WA assay probe has a 98.09% match to the database sequences (Figure 3A).  
235 Two variation types were found for the rest of the 1.91% genomes. A 7-nucleotide variation  
236 (variation\_1) was found in 28 genomes from 1978 to 2007 (Figure 3A and 3D). Variation\_1  
237 reappears in 2022 in one male patient's sample (age 50) from Luxembourg, and four children  
238 samples (age 3 to 10) from Tshopo and Kwilu provinces in the Democratic Republic of the  
239 Congo. Although 99.54% of the 2022 MPV genomes are conserved in this probe region, one new  
240 C->T synonymous variation (variation\_2) (Figure 3A) was identified from a sample obtained on  
241 May 18, 2022 from Canada. Those results suggest that the genetic variations in MPV conserved  
242 genomic regions covering the real-time PCR primer and probe sequences might be used to  
243 indicate the temporal and spatial emergence pattern of monkeypox disease.

244

## 245 **Discussion**

246 Accurate diagnostics are fundamental for successful epidemic control<sup>22</sup>. PCR-based molecular  
247 methods are widely used for pathogen detection in clinical and environmental samples. As a  
248 rapid and reliable tool, TaqMan real-time PCR offers high sensitivity and specificity that targets  
249 a respective pathogen's genome by using a designed probe, and forward and reverse primers.  
250 Therefore, an exact match between the three oligos and the target genome are required for  
251 sensitive and accurate diagnostics. Here, we analyzed the sequence of primers and probe used in  
252 the CDC recommended MPV generic real-time PCR assay as well as seven other MPV and OPV  
253 diagnostic assays by aligning respective primer/probe sequences against published MPV full

254 genomes. Our results showed two mismatches in more than 99% of genomes for the MPV  
255 generic forward and reverse primers (Figure 1). One mutation G194233A is close to the 3' end  
256 of the reverse primer, suggesting it may significantly impact the binding efficiency during  
257 amplification.

258

259 Theoretically, every mismatch, irrespective of its position within the primer sequence could  
260 reduce thermal stability of the primer-template DNA duplex and impact PCR performance<sup>23,24</sup>.  
261 Mismatches have often been reported to undermine real-time PCR based diagnostics.  
262 Stadhouders *et al.* examined the impact of primer-template mismatches and found that one G→A  
263 mismatch at the 3' end of primer could lead to an increase of >8 Ct values depending on the  
264 position<sup>24</sup>. Klungthong *et al.* found a single mismatch at the 3<sup>rd</sup> base of the probe significantly  
265 reduced sensitivity for detection of influenza A/H1N1/2009<sup>25</sup>. In another study, Persson *et al*  
266 reported that that a single G→T mismatch at 3' -end of the reverse primer for detection of  
267 hepatitis A virus by RT-PCR assay causes underestimation of the template concentration by a  
268 factor of 1.7–1.8 and an ~2-fold increase in 95% LOD<sup>26</sup>.

269

270 The two identified mismatches, despite neither of them being at the 1<sup>st</sup> position of 3' end, may  
271 have combined effects on PCR performance. We thus synthesized primers with an identical  
272 match to the MPV genome and compared results generated by the assay with mismatches. Our  
273 results showed that the two primer-template mismatches resulted in a ~11-fold underestimation  
274 of initial template DNA in the reaction and 4-fold increase in the 95% LOD in our real-time PCR  
275 settings. Those results indicated that the mismatch-corrected assay with full complementarity  
276 between primers and current MPV genomes could provide a more sensitive detection of MPV,

277 which is important for samples with low viral concentrations such as wastewater<sup>27-30</sup>.  
278 Furthermore, the fully matched primers showed an improved quantification of the initial DNA  
279 concentration needed for the quantitative analysis associated with tracking disease progression or  
280 assessing estimates of prevalence.

281  
282 Of the seven other assays evaluated for MPV or OPV detection, MPV\_F3L, MPV\_G2R\_WA,  
283 and OPV\_F8L had the highest matches (>99%) to the 2022 global genome database. However,  
284 specificity, another important parameter for real-time PCR-based diagnostics, needs further  
285 investigation for these three assays. For example, we found that primers and probe in the  
286 MPV\_F3L assay had high a homology to OM460002.1 cowpox virus isolate No-H2 genome  
287 (two mismatches in the probe and reverse primer), suggesting it could also amplify cowpox virus.  
288 On the other hand, the choice for the three assays may also depend on the sample types. For  
289 example, the three assays may work well for clinical samples and provide reliable diagnostics for  
290 human MPV. However, extra attention is needed to interpret positive results for wastewater  
291 samples, which may contain waste of human, cat, dog, mice, rabbits, and cow origins<sup>31</sup>.

292  
293 It is necessary to mention that sequence matching is just one of the parameters determining the  
294 detection sensitivity and specificity. Other parameters such as primer dimer formation, GC  
295 content, the quality of the template DNA, the PCR master mix, and inhibitors present in the  
296 sample may also impact the diagnostic efficiency and mismatch-induced effects<sup>24,32,33</sup>. An ideal  
297 diagnostic assay needs to consider and assess those factors in a comprehensive way. This study  
298 used a synthetic MPV gene fragment to test the mismatch effects, but it is recommended to

299 verify the results using a full-length viral genome, which may introduce more complexity and  
300 even increase the underestimation <sup>26</sup>.

301  
302 In summary, our analysis showed that primers and probe in the recommended MPV generic real-  
303 time assay harbor wide deviations from the sequenced MPV genomes, especially the genomes  
304 released in current monkeypox outbreak. The mismatch-corrected assay, harboring full  
305 complementarity to >97% MPV genomes, shows a higher sensitivity and improved  
306 quantification and may be an alternative approach for the MPV detection. Improved diagnostic  
307 capabilities are critical as public health practitioners and clinicians respond to the growing MPV  
308 outbreak.

309

### 310 **Declaration of Competing Interest**

311 The authors declare no competing interest.

312

### 313 **Code Availability**

314 All data and code produced in the present study are available upon reasonable request to the  
315 authors.

316

### 317 **Acknowledgement**

318 We are grateful to Dr. Alanna Morrison and the colleagues in the TEPHI for helpful discussion.

319 This work is supported by Faculty Startup funding from the Center of Infectious Diseases at

320 UTHealth, the UT system Rising STARS award, and the Texas Epidemic Public Health Institute

321 (TEPHI).

322

### 323 Ethical Approval Statement

324 This article does not contain any studies involving animals or humans performed by any authors.

325

### 326 Reference

- 327 1. CDC. 2022 Monkeypox Outbreak Global Map. Centers for Disease Control and Prevention.  
328 Published June 24, 2022. Accessed August 9, 2022.  
329 <https://www.cdc.gov/poxvirus/monkeypox/lab-personnel/index.html>
- 330 2. Petersen E, Kantele A, Koopmans M, et al. Human Monkeypox: Epidemiologic and Clinical  
331 Characteristics, Diagnosis, and Prevention. *Infectious Disease Clinics*. 2019;33(4):1027-  
332 1043. doi:10.1016/j.idc.2019.03.001
- 333 3. Frampton D, Rampling T, Cross A, et al. Genomic characteristics and clinical effect of the  
334 emergent SARS-CoV-2 B.1.1.7 lineage in London, UK: a whole-genome sequencing and  
335 hospital-based cohort study. *The Lancet Infectious Diseases*. 2021;21(9):1246-1256.  
336 doi:10.1016/S1473-3099(21)00170-5
- 337 4. Breman JG, Kalisa-Ruti, Steniowski MV, Zanotto E, Gromyko AI, Arita I. Human  
338 monkeypox, 1970-79. *Bull World Health Organ*. 1980;58(2):165-182.
- 339 5. Thornhill JP, Barkati S, Walmsley S, et al. Monkeypox Virus Infection in Humans across 16  
340 Countries — April–June 2022. *New England Journal of Medicine*. 2022;0(0):null.  
341 doi:10.1056/NEJMoa2207323
- 342 6. Titanji BK, Tegomoh B, Nematollahi S, Konomos M, Kulkarni PA. Monkeypox: A  
343 Contemporary Review for Healthcare Professionals. *Open Forum Infectious Diseases*.  
344 2022;9(7):ofac310. doi:10.1093/ofid/ofac310
- 345 7. Kumar N, Acharya A, Gendelman HE, Byrareddy SN. The 2022 outbreak and the  
346 pathobiology of the monkeypox virus. *Journal of Autoimmunity*. 2022;131:102855.  
347 doi:10.1016/j.jaut.2022.102855
- 348 8. Vivancos R, Anderson C, Blomquist P, et al. Community transmission of monkeypox in the  
349 United Kingdom, April to May 2022. *Euro Surveill*. 2022;27(22):2200422.  
350 doi:10.2807/1560-7917.ES.2022.27.22.2200422
- 351 9. CDC. Test Procedure: Monkeypox virus Generic Real-Time PCR Test. Centers for Disease  
352 Control and Prevention. Published June 6, 2022. Accessed August 9, 2022.  
353 <https://www.cdc.gov/poxvirus/monkeypox/pdf/PCR-Diagnostic-Protocol-508.pdf>

- 354 10. Li Y, Zhao H, Wilkins K, Hughes C, Damon IK. Real-time PCR assays for the specific  
355 detection of monkeypox virus West African and Congo Basin strain DNA. *J Virol Methods*.  
356 2010;169(1):223-227. doi:10.1016/j.jviromet.2010.07.012
- 357 11. Peiró-Mestres A, Fuertes I, Camprubí-Ferrer D, et al. Frequent detection of monkeypox virus  
358 DNA in saliva, semen, and other clinical samples from 12 patients, Barcelona, Spain, May to  
359 June 2022. *Eurosurveillance*. 2022;27(28):2200503. doi:10.2807/1560-  
360 7917.ES.2022.27.28.2200503
- 361 12. Wolfe MK, Duong D, Hughes B, Chan-Herur V, White BJ, Boehm AB. Detection of  
362 monkeypox viral DNA in a routine wastewater monitoring program. Published online July  
363 26, 2022:2022.07.25.22278043. doi:10.1101/2022.07.25.22278043
- 364 13. Wawina-Bokalanga T, Sklenovska N, Vanmechelen B, et al. An accurate and rapid Real-  
365 time PCR approach for human Monkeypox virus diagnosis. Published online June 23,  
366 2022:2022.06.23.22276033. doi:10.1101/2022.06.23.22276033
- 367 14. Maksyutov RA, Gavrilova EV, Shchelkunov SN. Species-specific differentiation of variola,  
368 monkeypox, and varicella-zoster viruses by multiplex real-time PCR assay. *J Virol Methods*.  
369 2016;236:215-220. doi:10.1016/j.jviromet.2016.07.024
- 370 15. Stellberger T, Stockmar I, Haase M, et al. Multiplex Real-Time PCR Assay for the Detection  
371 and Differentiation of Poxviruses and Poxvirus Vectors. *Applied Biosafety*.  
372 2015;20(4):192-200. doi:10.1177/153567601502000405
- 373 16. Schroeder K, Nitsche A. Multicolour, multiplex real-time PCR assay for the detection of  
374 human-pathogenic poxviruses. *Mol Cell Probes*. 2010;24(2):110-113.  
375 doi:10.1016/j.mcp.2009.10.008
- 376 17. CDC. Test Procedure: Non-variola Orthopoxvirus Generic Real-Time PCR Test. Published  
377 June 6, 2022. [https://www.cdc.gov/poxvirus/monkeypox/pdf/non-variola-orthopoxvirus-  
378 generic-real-time-pcr-test.pdf](https://www.cdc.gov/poxvirus/monkeypox/pdf/non-variola-orthopoxvirus-generic-real-time-pcr-test.pdf)
- 379 18. Nasir A, Caetano-Anollés G. A phylogenomic data-driven exploration of viral origins and  
380 evolution. *Science Advances*. 2015;1(8):e1500527. doi:10.1126/sciadv.1500527
- 381 19. Villarreal LP. Evolution of Viruses. *Encyclopedia of Virology*. Published online 2008:174-  
382 184. doi:10.1016/B978-012374410-4.00706-8
- 383 20. Wang L, Shang J, Weng S, et al. Genomic annotation and molecular evolution of  
384 monkeypox virus outbreak in 2022. *Journal of Medical Virology*. 2022;1(7).  
385 doi:10.1002/jmv.28036
- 386 21. Petersen BW, Karem KL, Damon IK. Orthopoxviruses: Variola, Vaccinia, Cowpox, and  
387 Monkeypox. In: Kaslow RA, Stanberry LR, Le Duc JW, eds. *Viral Infections of Humans:  
388 Epidemiology and Control*. Springer US; 2014:501-517. doi:10.1007/978-1-4899-7448-8\_21



- 389 22. Kelly-Cirino CD, Nkengasong J, Kettler H, et al. Importance of diagnostics in epidemic and  
390 pandemic preparedness. *BMJ Glob Health*. 2019;4(Suppl 2):e001179. doi:10.1136/bmjgh-  
391 2018-001179
- 392 23. So KYK, Fong JJ, Lam IPY, Dudgeon D. Pitfalls during in silico prediction of primer  
393 specificity for eDNA surveillance. *Ecosphere*. 2020;11(7):e03193. doi:10.1002/ecs2.3193
- 394 24. Stadhouders R, Pas SD, Anber J, Voermans J, Mes THM, Schutten M. The Effect of Primer-  
395 Template Mismatches on the Detection and Quantification of Nucleic Acids Using the 5'  
396 Nuclease Assay. *The Journal of Molecular Diagnostics*. 2010;12(1):109-117.  
397 doi:10.2353/jmoldx.2010.090035
- 398 25. Klungthong C, Chinnawirotpisan P, Hussem K, et al. The impact of primer and probe-  
399 template mismatches on the sensitivity of pandemic influenza A/H1N1/2009 virus detection  
400 by real-time RT-PCR. *J Clin Virol*. 2010;48(2):91-95. doi:10.1016/j.jcv.2010.03.012
- 401 26. Persson S, Karlsson M, Borsch-Reniers H, Ellström P, Eriksson R, Simonsson M. Missing  
402 the Match Might Not Cost You the Game: Primer-Template Mismatches Studied in Different  
403 Hepatitis A Virus Variants. *Food Environ Virol*. 2019;11(3):297-308. doi:10.1007/s12560-  
404 019-09387-z
- 405 27. Wu F, Zhang J, Xiao A, et al. SARS-CoV-2 Titers in Wastewater Are Higher than Expected  
406 from Clinically Confirmed Cases. *mSystems*. 2020;5(4):e00614-20.  
407 doi:10.1128/mSystems.00614-20
- 408 28. Wu F, Lee WL, Chen H, et al. Making Waves: Wastewater Surveillance of SARS-CoV-2 in  
409 an Endemic Future. *Water Research*. Published online May 3, 2022:118535.  
410 doi:10.1016/j.watres.2022.118535
- 411 29. Wölfel R, Corman VM, Guggemos W, et al. Virological assessment of hospitalized patients  
412 with COVID-2019. *Nature*. 2020;581(7809):465-469. doi:10.1038/s41586-020-2196-x
- 413 30. Killingley B, Mann AJ, Kalinova M, et al. Safety, tolerability and viral kinetics during  
414 SARS-CoV-2 human challenge in young adults. *Nat Med*. Published online March 31,  
415 2022:1-11. doi:10.1038/s41591-022-01780-9
- 416 31. Smyth DS, Trujillo M, Gregory DA, et al. Tracking cryptic SARS-CoV-2 lineages detected  
417 in NYC wastewater. *Nat Commun*. 2022;13(1):635. doi:10.1038/s41467-022-28246-3
- 418 32. Kralik P, Ricchi M. A Basic Guide to Real Time PCR in Microbial Diagnostics: Definitions,  
419 Parameters, and Everything. *Frontiers in Microbiology*. 2017;8. Accessed August 10, 2022.  
420 <https://www.frontiersin.org/articles/10.3389/fmicb.2017.00108>
- 421 33. Ruijter JM, Ramakers C, Hoogaars WMH, et al. Amplification efficiency: linking baseline  
422 and bias in the analysis of quantitative PCR data. *Nucleic Acids Res*. 2009;37(6):e45.  
423 doi:10.1093/nar/gkp045

424

425  
426  
427  
428  
429  
430  
431  
432  
433  
434  
435  
436  
437  
438

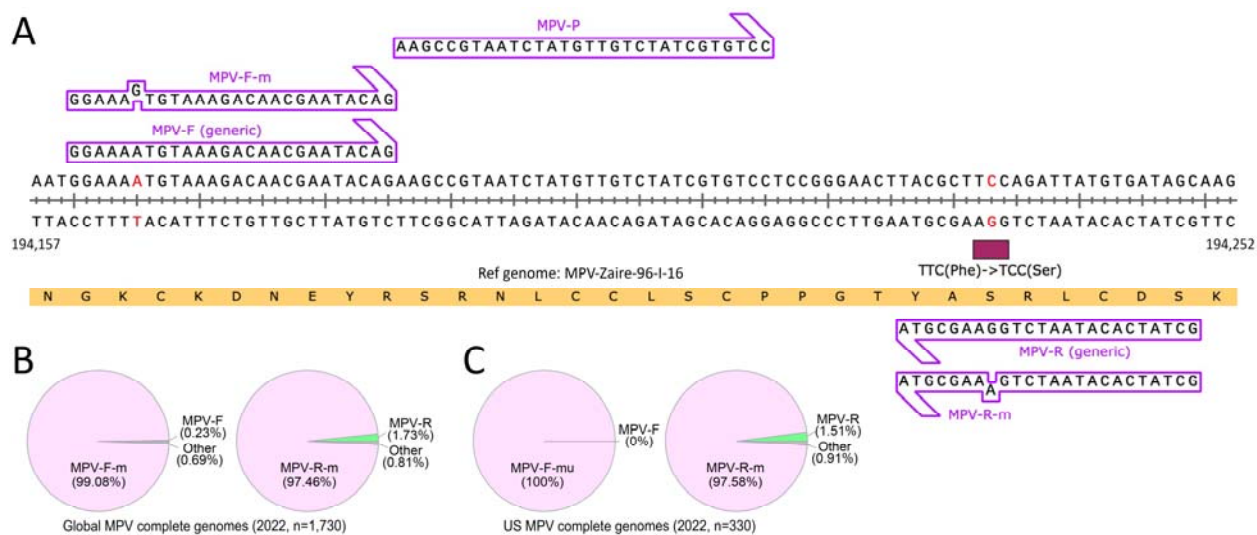

439  
440

441 **Figure 1. MPV generic forward and reverse primers do not match to the majority of**  
442 **reported genomes. (A)** Alignment of MPV generic forward primer, reverse primer, and probe  
443 sequences (recommended in the CDC test procedure for MPV <sup>9</sup>) to the MPV reference genome  
444 (MPV-Zaire-96-I-16). The corresponding oligo sequences with mismatches found in the genome  
445 database for forward (MPV-F-m) and reverse primers (MPV-R-m) were also added on top of the  
446 reference genome. Red nucleotides indicate genetic variations identified in the MPV genome  
447 database and the nonsynonymous mutation is marketed by a red box. **(B-C)** The abundance of  
448 MPV-F (generic) and MPV-F-m, MPV-R (generic) and MPV-R-m in the currently available  
449 1,730 MPV genomes worldwide published in 2022 (B), and in the 330 U.S. genomes (C).  
450

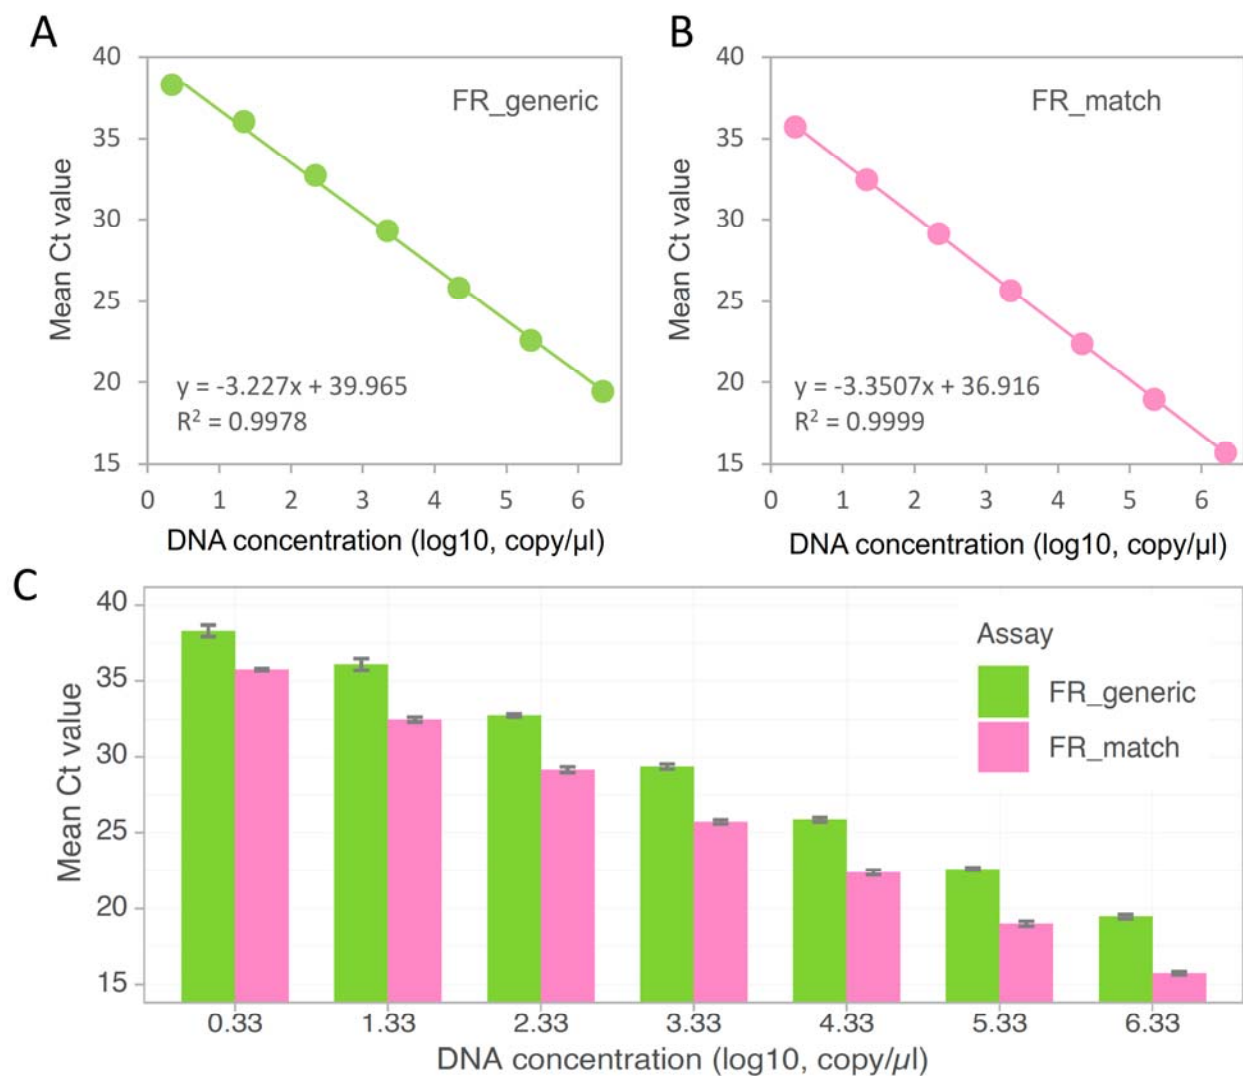

451

452

453 **Figure 2. Sensitivity analysis for the MPV generic real time PCR assay and mismatch**

454 **corrected assay. (A-B) Standard curves for MPV FR\_generic (A) and FR\_match (B) assays.**

455 Data shown represent the mean of three replicates with standard deviations. Trendlines with

456 trendline equations and coefficient of determination were added. (C) Mismatch-corrected assay

457 (FR\_match) has lower Ct values under the same concentrations of initial template DNA.

458

459

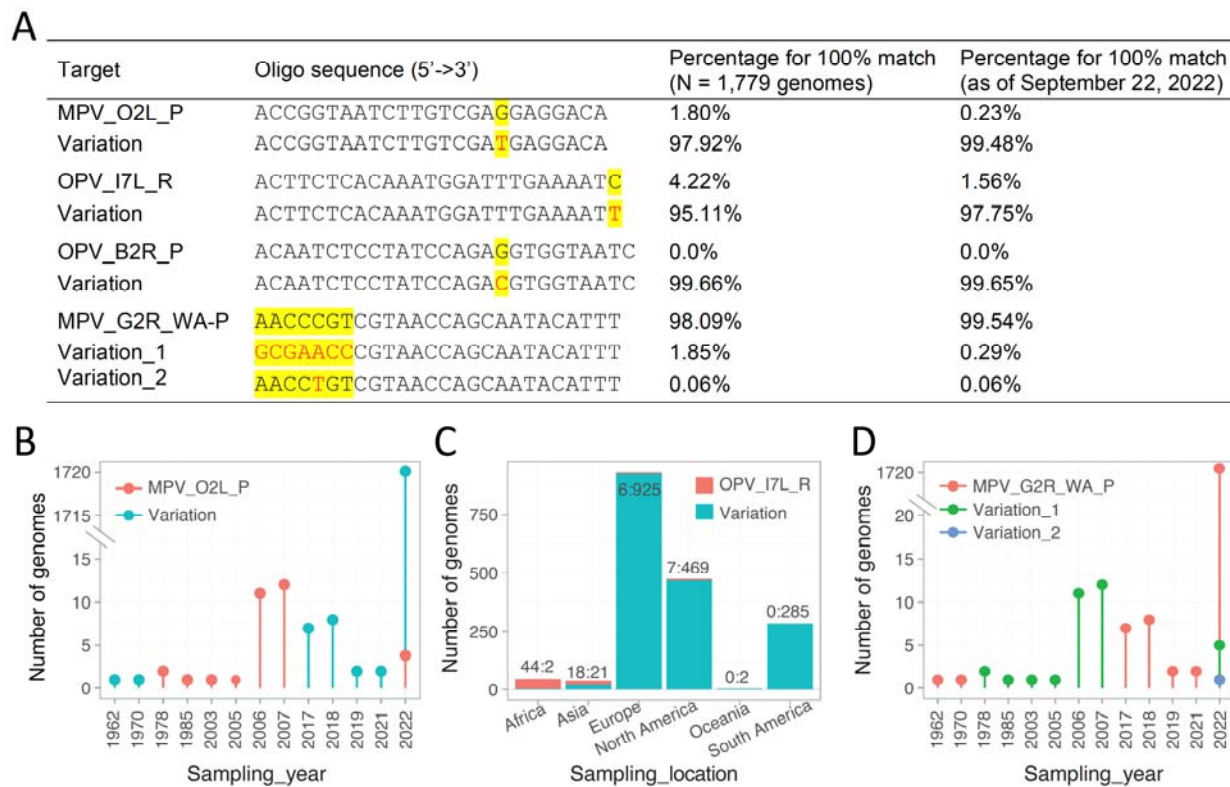

460

461 **Figure 3. Genetic variations across real-time PCR assays for MPV or OPV detection and**

462 **epidemiological analysis. (A) Genetic variations in the MPV genome database compared to**

463 **primer and probe sequences used in detection assays. (B) Temporal analysis for the genetic**

464 **variation in MPV\_O2L probe sequence. This variation is found in 99.48% of the genomes in**

465 **2022. (C) Proportion of genomes for the reverse primer used in the OPV\_I7L assay with or**

466 **without variation by continent. (D) Incidence of MPV\_G2R\_WA probe sequence and its two**

467 **variation types across the genomic database by year.**

468

469

470

471

472

473 **Table 1. Limits of detection for MPV generic assay (FR\_generic) and mismatch-corrected assay**  
 474 **(FR\_match).**

|            | DNA template volume (μl) | Synthetic MPV gene fragment concentrations (copies / mL) |              |              |              |              |             |              |
|------------|--------------------------|----------------------------------------------------------|--------------|--------------|--------------|--------------|-------------|--------------|
|            |                          | 21,622                                                   | 10,811       | 5,405        | 2,703        | 1,351        | 676         | 0            |
| FR_generic | 2                        | 100% (16/16)                                             | 100% (16/16) | 100% (16/16) | 75% (12/16)  | 50% (8/16)   | Not tested  | 12.5% (2/16) |
| FR_match   | 2                        | 100% (14/14)                                             | 100% (16/16) | 100% (16/16) | 100% (16/16) | 100% (32/32) | 81% (13/16) | 0% (0/16)    |

Note: Reactions with Ct < 40 are considered as 'positive'.

475  
476  
477

478

479 **Table 2. Evaluation of the sequence specificity of primers and probes for monkeypox virus**  
 480 **(MPV) or orthopoxvirus (OPV) detection.**

481

| Target     | Oligo <sup>1</sup> | Oligo sequence (5'→3')          | Percentage for 100% match (total MPV genomes, N=1,779) <sup>2</sup> | Percentage for 100% match (genomes in 2022, N=1,730) <sup>2</sup> |
|------------|--------------------|---------------------------------|---------------------------------------------------------------------|-------------------------------------------------------------------|
| MPV_O2L    | Forward (+)        | TAGTGAGTTCGGCGACAAAG            | 99.78%                                                              | 99.77%                                                            |
|            | Reverse (+)        | GTATCGCATCTCTCGGGTATTC          | 98.99%                                                              | 98.96%                                                            |
|            | Probe (+)          | ACCGTAATCTTGTCGAGGAGACA         | 1.80%                                                               | 0.23%                                                             |
| MPV_F3L    | Forward (+)        | CATCTATTATAGCATCAGCATCAGA       | 99.72%                                                              | 99.71%                                                            |
|            | Reverse (+)        | GATACTCCTCCTCGTTGGTCTAC         | 99.83%                                                              | 99.83%                                                            |
|            | Probe (+)          | TGTAGGCCGTGTATCAGCATCCATT       | 99.78%                                                              | 99.77%                                                            |
| MPV_C3L    | Forward (-)        | TGTCTACCTGGATACAGAAAGCAA        | 1.80%                                                               | 0.23%                                                             |
|            | Reverse (-)        | GGCATCTCCGTTAATACATTGAT         | 1.80%                                                               | 0.23%                                                             |
|            | Probe (-)          | CCCATATATGCTAAATGTACCGGTACCGGA  | 1.80%                                                               | 0.23%                                                             |
| MPV_G2R_WA | Forward (±)        | CACACCGTCTCTTCCACAGA            | 100.0%                                                              | 100.00%                                                           |
|            | Reverse (±)        | GATACAGGTTAATTTCCACATCG         | 100.0%                                                              | 100.00%                                                           |
|            | Probe (±)          | AACCCGTCGTAACCAGCAATACATTT      | 98.09%                                                              | 99.65%                                                            |
| OPV_B2R    | Forward (+)        | CTATCAAAGAGAAGGCCAA             | 99.83%                                                              | 99.83%                                                            |
|            | Reverse (+)        | ATTCTCATAATTTCCCTTCCAT          | 99.83%                                                              | 99.83%                                                            |
|            | Probe (-)          | ACAATCTCTATCCAGAGGTGGTAATC      | 0.00%                                                               | 0.00%                                                             |
| OPV_I7L    | Forward (+)        | TAATACTTCGATTGCTCATCCAGG        | 99.27%                                                              | 99.25%                                                            |
|            | Reverse (+)        | ACTTCTCACAAATGGATTGAAAATC       | 4.22%                                                               | 1.56%                                                             |
|            | Probe (+)          | TCCTTACGTGATAAATCAT             | 99.55%                                                              | 99.54%                                                            |
| OPV_F8L    | Forward (-)        | TCAACTGAAAAGGCCATCTATGA         | 99.38%                                                              | 99.36%                                                            |
|            | Reverse (-)        | GAGTATAGAGCACTATTTCTAAATCCCA    | 99.21%                                                              | 99.19%                                                            |
|            | Probe (-)          | CCATGCAATATACGTACAGATAGTAGCCAAC | 99.16%                                                              | 99.13%                                                            |

482 <sup>1</sup>: (+): indicates sense strand; (-) indicates anti-sense strand; (±) indicates that oligo has two binding sites, one each on sense  
 483 and antisense strand.

484 <sup>2</sup>: This is the percentage of complete genomes that the primer/probe sequence can 100% match with at least one target site. As  
 485 of September 22 (10:50am), there are 1,779 complete genomes published in GISAID, of which 1,730 are published in 2022.

486
